# Supplementary material for: Predicting Dynamics of the Potential Breeding Habitat of Larus saundersi by MaxEnt Model under Changing Land-Use Conditions in Wetland Nature Reserve of Liaohe Estuary, China
Source: MDPI journal article supplement (doi:10.3390/rs14030552), 2022-01-24
Supplement: s1 [file s1]

## Article

# Predicting Dynamics of the Potential Breeding Habitat of *Larus saundersi* by MaxEnt Model under Changing Land-Use Conditions in Wetland Nature Reserve of Liaohe Estuary, China

Yu Chang <sup>1</sup>, Chang Chang <sup>1,2</sup>, Yuxiang Li <sup>3</sup>, Miao Liu <sup>1,\*</sup>, Jiujuun Lv <sup>4</sup> and Yuanman Hu <sup>1</sup>

<sup>1</sup> Institute of Applied Ecology, Chinese Academy of Sciences, Shenyang 110016, China; changyu@iae.ac.cn (Y.C.); changchang20@mails.ucas.ac.cn (C.C.); huym@iae.ac.cn (Y.H.)

<sup>2</sup> University of Chinese Academy of Sciences, Beijing 100049, China

<sup>3</sup> The Panjing Service Center for Forest and Wetland Conservation, Panjing 124010, China; liyuxiang1966@163.com

<sup>4</sup> Liaoning Science and Technology Center for Ecological and Environmental Protection, Shenyang 110161, China; lvjiujun@163.com

\* Corresponding author: lium@iae.ac.cn

**Citation:** Chang, Y.; Chang, C.; Li, Y.; Liu, M.; Lv, J.; Hu, Y. Predicting Dynamics of the Potential Breeding Habitat of *Larus saundersi* by MaxEnt Model under Changing Land Use Conditions in Wetland Nature Reserve of Liaohe Estuary, China. *Remote Sens.* **2022**, *14*, 552. <https://doi.org/10.3390/rs14030552>

Academic Editors: Alfredo Huete and Parth Sarathi Roy

Received: 3 December 2021

Accepted: 20 January 2022

Published: 25 January 2022

**Publisher's Note:** MDPI stays neutral with regard to jurisdictional claims in published maps and institutional affiliations.

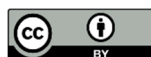

**Copyright:** © 2022 by the authors. Licensee MDPI, Basel, Switzerland. This article is an open access article distributed under the terms and conditions of the Creative Commons Attribution (CC BY) license (<https://creativecommons.org/licenses/by/4.0/>).

**Table S1.** Change rate (%) of different habitat suitability classes of *Larus saundersi* during various change periods.

| Period    | US    | LS     | S      | MS     |
|-----------|-------|--------|--------|--------|
| 1988-2000 | 4.38  | -14.54 | -12.22 | -33.13 |
| 1988-2009 | 3.48  | -6.47  | -25.15 | -34.89 |
| 1988-2017 | 3.26  | -8.69  | -20.18 | -25.03 |
| 2000-2009 | -0.87 | 9.45   | -14.73 | -2.64  |
| 2000-2017 | -1.08 | 6.85   | -9.07  | 12.10  |
| 2009-2017 | -0.22 | -2.37  | 6.63   | 15.14  |

Notes: US-Unsuitable, LS-Less Suitable, S-Suitable and MS-Most Suitable.

**Table S2.** Change rate (%) of different land-use types during various change periods.

| Period    | NIF    | PD     | RD     | SW     | AF     | WB    | MF     | SCP    | SS     |
|-----------|--------|--------|--------|--------|--------|-------|--------|--------|--------|
| 1988-2000 | 50.68  | 604.42 | -5.08  | -83.34 | 78.24  | 27.44 | -10.86 | 285.54 | 5.29   |
| 1988-2009 | 102.79 | 559.22 | -7.27  | -76.31 | 115.45 | 40.94 | 31.23  | 583.84 | -28.25 |
| 1988-2017 | 304.93 | 563.52 | -13.19 | 1.70   | 84.24  | 60.65 | -23.36 | 685.90 | -9.64  |
| 2000-2009 | 34.58  | -6.42  | -2.31  | 42.25  | 20.88  | 10.60 | 47.22  | 77.37  | -31.85 |
| 2000-2017 | 168.73 | -5.81  | -8.54  | 510.59 | 3.37   | 26.07 | -14.03 | 103.85 | -14.18 |
| 2009-2017 | 99.68  | 0.65   | -6.38  | 329.23 | -14.49 | 13.98 | -41.60 | 14.92  | 25.94  |

Notes: NIF- Non-Irrigated Farmland, PD-Paddy field, RD-Reed marsh, SW- Seepweed marsh, AF- Artificial Facility, WB-Water Body, MF-Muddy Flat, SCP- Shrimp and Crab Pond, and SS-Shallow Sea.

**Table S3.** Area and percentage of every land-use type out of each habitat suitability class of *Larus saundersi* in different years.

| Code for Suitable Classes | Code for Land use types | 1988      |             | 2000      |             | 2009      |            | 2017      |             |
|---------------------------|-------------------------|-----------|-------------|-----------|-------------|-----------|------------|-----------|-------------|
|                           |                         | Area (ha) | Percent (%) | Area (ha) | Percent (%) | Area (ha) | Percent(%) | Area (ha) | Percent (%) |
| 1                         | 1                       | 98.82     | 0.12        | 148.59    | 0.18        | 199.17    | 0.24       | 396.99    | 0.48        |
| 1                         | 2                       | 954.09    | 1.18        | 5111.55   | 6.34        | 5542.47   | 6.69       | 5174.55   | 6.25        |
| 1                         | 3                       | 39209     | 48.64       | 35219.2   | 43.69       | 35625.9   | 42.98      | 33593.3   | 40.57       |
| 1                         | 4                       | 14.58     | 0.02        | 199.35    | 0.25        | 287.01    | 0.35       | 145.8     | 0.18        |
| 1                         | 5                       | 1245.87   | 1.55        | 1767.24   | 2.19        | 2421.9    | 2.92       | 1601.91   | 1.93        |
| 1                         | 6                       | 8211.24   | 10.19       | 7472.88   | 9.27        | 14022.7   | 16.92      | 8172.81   | 9.87        |
| 1                         | 7                       | 225.99    | 0.28        | 1582.92   | 1.96        | 4538.25   | 5.47       | 5369.04   | 6.48        |
| 1                         | 8                       | 28410.3   | 35.25       | 28883.2   | 35.83       | 19844     | 23.94      | 25607.7   | 30.93       |
| 1                         | 9                       | 2234.79   | 2.77        | 219.87    | 0.27        | 409.14    | 0.49       | 2734.29   | 3.30        |
| subtotal                  |                         | 80604.68  | 100.00      | 80604.8   | 100.00      | 82890.54  | 100.00     | 82796.39  | 100.00      |
| 2                         | 1                       | 0         | 0.00        | 0         | 0.00        | 1.17      | 0.01       | 1.71      | 0.01        |
| 2                         | 2                       | 7.56      | 0.05        | 1335.51   | 9.49        | 722.25    | 5.44       | 1119.78   | 8.65        |
| 2                         | 3                       | 3544.65   | 25.18       | 4257.45   | 30.24       | 4401.18   | 33.14      | 4138.65   | 31.97       |
| 2                         | 4                       | 89.46     | 0.64        | 104.4     | 0.74        | 74.7      | 0.56       | 137.07    | 1.06        |
| 2                         | 5                       | 686.61    | 4.88        | 705.15    | 5.01        | 443.97    | 3.34       | 1155.33   | 8.92        |
| 2                         | 6                       | 5840.82   | 41.49       | 4720.41   | 33.53       | 5691.33   | 42.85      | 3363.39   | 25.98       |
| 2                         | 7                       | 425.16    | 3.02        | 1230.39   | 8.74        | 627.12    | 4.72       | 575.37    | 4.44        |
| 2                         | 8                       | 233.28    | 1.66        | 1253.79   | 8.91        | 648.54    | 4.88       | 264.24    | 2.04        |
| 2                         | 9                       | 3250.35   | 23.09       | 470.79    | 3.34        | 670.5     | 5.05       | 2190.33   | 16.92       |
| subtotal                  |                         | 14077.89  | 100.00      | 14077.89  | 100.00      | 13280.76  | 100.00     | 12945.87  | 100.00      |
| 3                         | 1                       | 0         | 0.00        | 0         | 0.00        | 0         | 0.00       | 0         | 0.00        |
| 3                         | 2                       | 0         | 0.00        | 184.32    | 6.40        | 61.65     | 2.95       | 70.92     | 3.00        |
| 3                         | 3                       | 700.2     | 24.32       | 705.96    | 24.52       | 487.17    | 23.33      | 261.09    | 11.03       |
| 3                         | 4                       | 69.75     | 2.42        | 38.79     | 1.35        | 29.25     | 1.40       | 25.92     | 1.09        |
| 3                         | 5                       | 69.48     | 2.41        | 96.57     | 3.35        | 28.89     | 1.38       | 355.05    | 14.99       |
| 3                         | 6                       | 1383.66   | 48.06       | 1569.33   | 54.51       | 1116.81   | 53.48      | 724.68    | 30.61       |
| 3                         | 7                       | 73.08     | 2.54        | 105.12    | 3.65        | 62.91     | 3.01       | 84.33     | 3.56        |
| 3                         | 8                       | 47.43     | 1.65        | 58.05     | 2.02        | 58.14     | 2.78       | 6.57      | 0.28        |
| 3                         | 9                       | 535.59    | 18.60       | 121.05    | 4.20        | 243.54    | 11.66      | 839.25    | 35.44       |
| subtotal                  |                         | 2879.19   | 100.00      | 2879.19   | 100.00      | 2088.36   | 100.00     | 2367.81   | 100.00      |
| 4                         | 1                       | 0         | 0.00        | 0         | 0.00        | 0         | 0.00       | 0         | 0.00        |
| 4                         | 2                       | 0         | 0.00        | 125.73    | 5.68        | 32.04     | 2.04       | 30.06     | 1.75        |
| 4                         | 3                       | 455.85    | 20.59       | 640.89    | 28.94       | 241.47    | 15.39      | 111.24    | 6.47        |
| 4                         | 4                       | 31.86     | 1.44        | 6.57      | 0.30        | 30.6      | 1.95       | 42.93     | 2.50        |
| 4                         | 5                       | 66.51     | 3.00        | 67.14     | 3.03        | 20.07     | 1.28       | 210.69    | 12.26       |
| 4                         | 6                       | 1145.7    | 51.74       | 1014.57   | 45.82       | 918.72    | 58.56      | 439.56    | 25.58       |
| 4                         | 7                       | 47.61     | 2.15        | 57.06     | 2.58        | 60.12     | 3.83       | 51.66     | 3.01        |
| 4                         | 8                       | 15.84     | 0.72        | 33.84     | 1.53        | 50.85     | 3.24       | 1.71      | 0.10        |
| 4                         | 9                       | 451.08    | 20.37       | 268.65    | 12.13       | 215.01    | 13.70      | 830.61    | 48.33       |
| subtotal                  |                         | 2214.45   | 100.00      | 2214.45   | 100.00      | 1568.88   | 100.00     | 1718.46   | 100.00      |

Notes: 1-unsuitable, 2-less suitable, 3-suitable, and 4-most suitable for code of suitable classes. 1-Non-irrigated farmland, 2-Paddy field, 3-Reed marsh, 4- Artificial facility, 5-Water body, 6-Muddy flat, 7- Shrimp and crab pond, 8-Shallow sea, and 9-Seepweed marsh for code of land-use types.

**Table S4.** Relative contributions of environmental variables to the *Larus saundersi* distribution predicted by the Maxent model. Lu: Land-use types, D\_cl: Distance to coastlines, D\_af: Distance to artificial facilities, D\_rl: Distance to linear rivers, NDVI: Normalized Difference Vegetation Index, D\_road: Distance to roads, and Dem30m: Digital Elevation Model with 30 m spatial resolution.

| Variables | Percent contribution (%) |      |      |      |
|-----------|--------------------------|------|------|------|
|           | 1988                     | 2000 | 2009 | 2017 |
| Lu        | 40.3                     | 32.4 | 16.4 | 35.8 |
| D_cl      | 34.7                     | 35.1 | 48.0 | 34.5 |
| D_af      | 8.8                      | 11.1 | 5.9  | 7.2  |
| D_rl      | 11.0                     | 11.0 | 9.7  | 5.5  |
| NDVI      | 0.3                      | 6.3  | 4.8  | 5.2  |
| D_road    | 4.3                      | 3.9  | 12.5 | 10.6 |
| DEM30m    | 0.7                      | 0.2  | 2.6  | 1.2  |

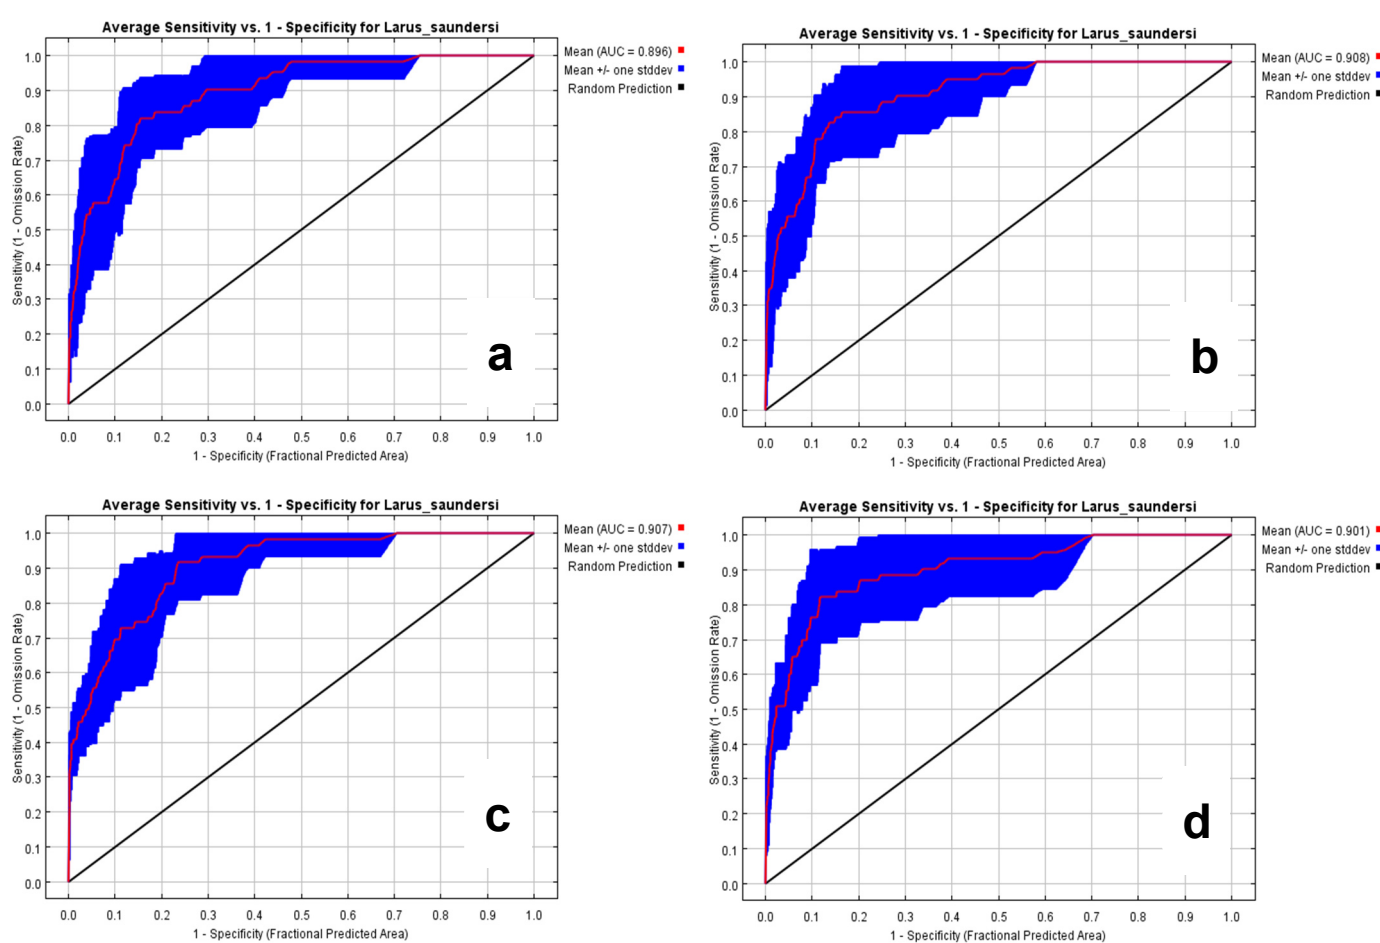

**Figure S1.** ROC curves for evaluating the performance of the MaxEnt model. a-1988, b-2000, c-2009, and d-2017. The red line represents the mean of 10 replicates, and the blue color represents the error bar with one standard deviation. The black line represents random predictions.

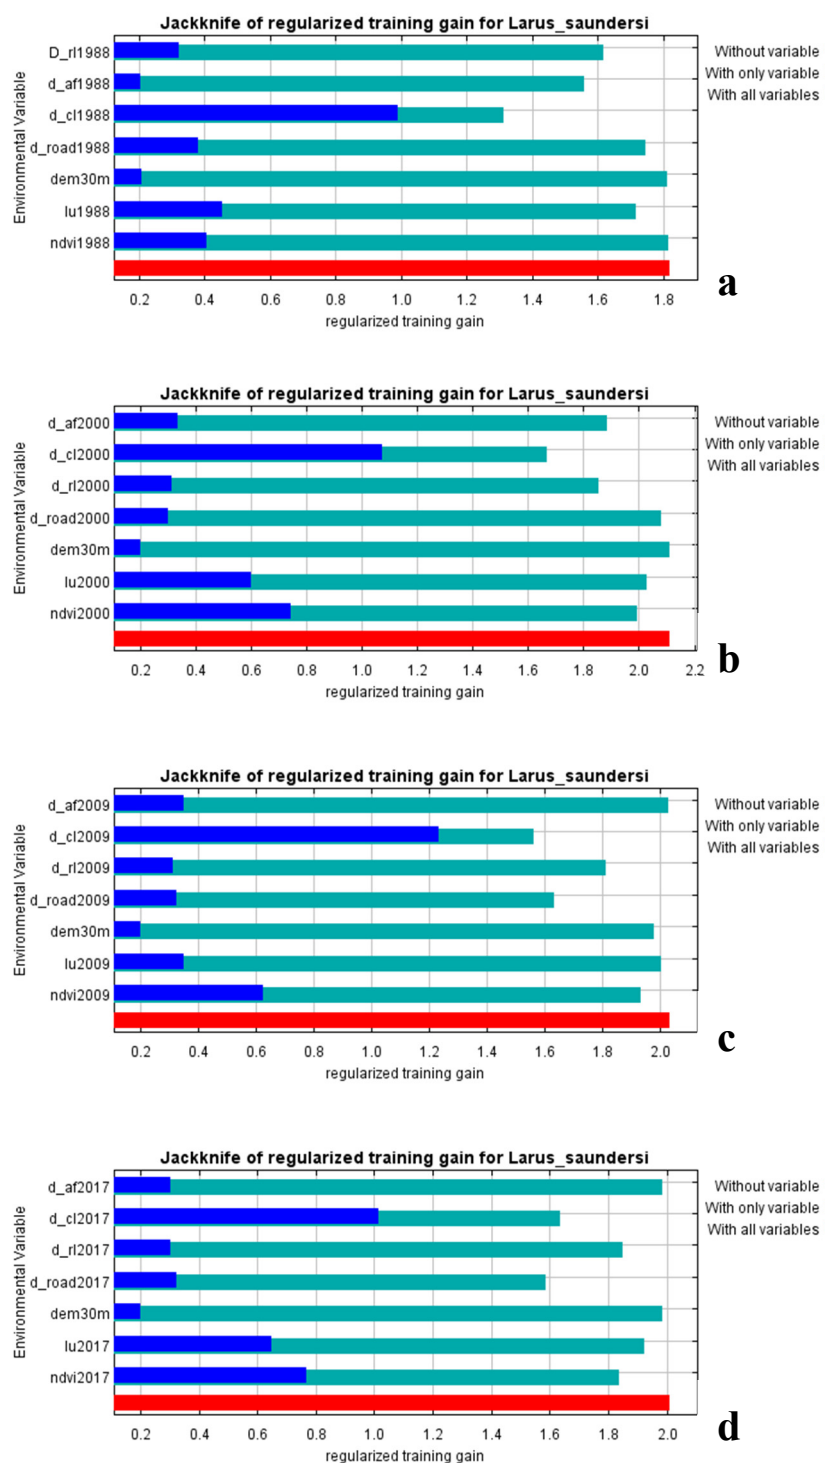

**Figure S2.** Importance of environmental variables to *Larus saundersi* distribution by using jackknife analysis. a-1988, b-2000, c-2009, and d-2017.

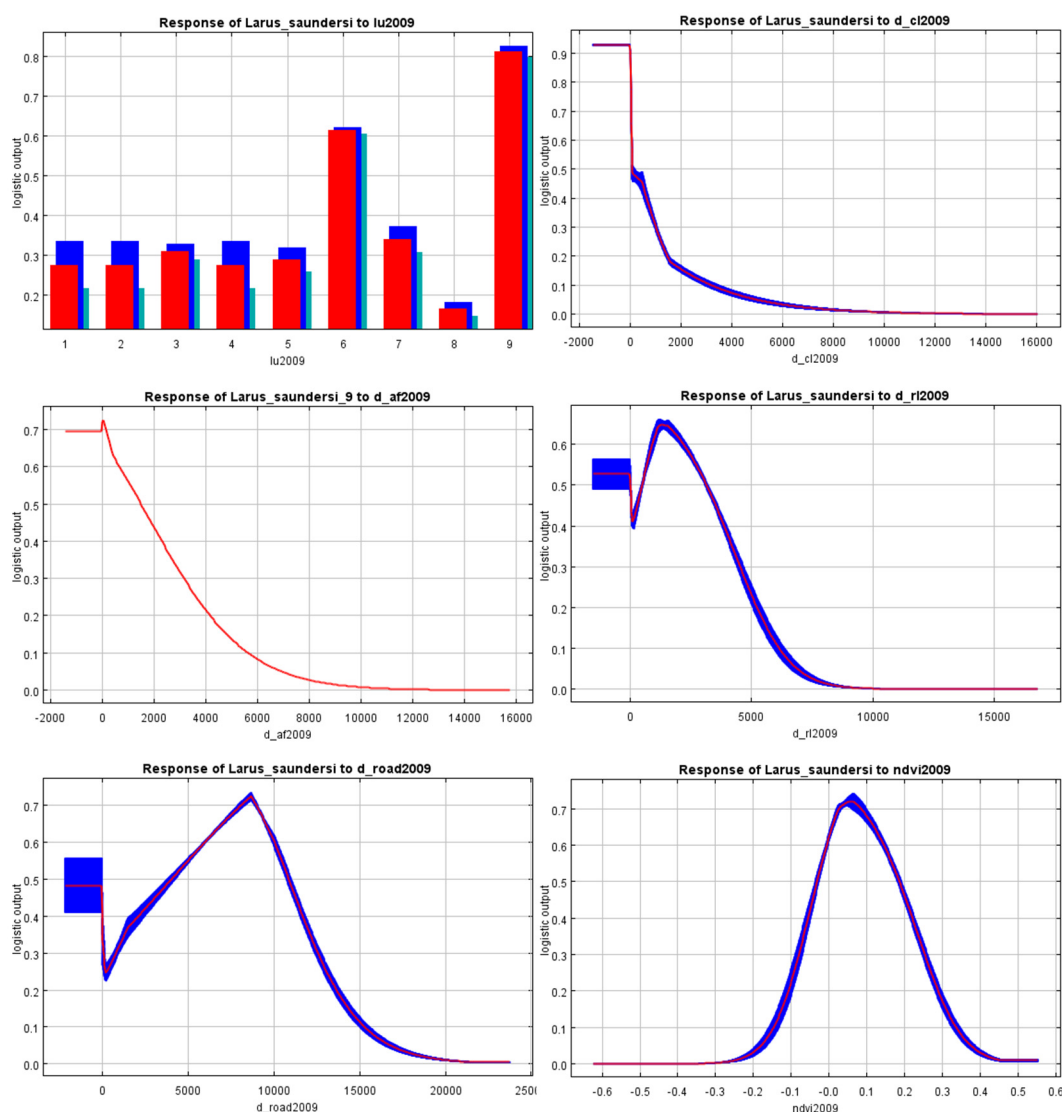

**Figure S3.** Response curves of selected environmental variables to predicted probability contributions using 2009 as an example. The red color represents the mean of 10 replicates, and the blue color represents the standard deviation. The numbers under the horizontal axis of the upper-left chart represent different land-use types, with 1 for non-irrigated farmland, 2 paddy fields, 3 reed marshes, 4 artificial facilities, 5 water bodies, 6 mudflats, 7 shrimp and crab ponds, 8 shallow water and 9 seepweed marshes.
